1 **RESEARCH ARTICLE:**

2 **Quantification of reactive oxygen species production by the red fluorescent proteins**  
3 **KillerRed, SuperNova and mCherry.**

4

5 **AUTHORS:**

6 John O. Onukwufor <sup>a1</sup>, Adam J. Trewin <sup>a1</sup>, Timothy M. Baran <sup>b</sup>, Anmol Almast <sup>a</sup>, Thomas H.  
7 Foster <sup>b</sup>, and Andrew P. Wojtovich <sup>a\*</sup>

8

9 **AFFILIATIONS:**

10 <sup>a</sup> University of Rochester Medical Center, Department of Anesthesiology and Perioperative  
11 Medicine, Rochester NY, 14642 United States.

12 <sup>b</sup> University of Rochester Medical Center, Department of Imaging Sciences, Rochester 14642,  
13 United States.

14

15 <sup>1</sup> These authors contributed equally

16 \* Corresponding author:

17 Andrew P. Wojtovich

18 Telephone: +1 585 275 4613

19 Email: [Andrew\\_wojtovich@urmc.rochester.edu](mailto:Andrew_wojtovich@urmc.rochester.edu)

20

21

22 **ABSTRACT**

23 Fluorescent proteins can generate reactive oxygen species (ROS) upon absorption of photons  
24 via type I and II photosensitization mechanisms. The red fluorescent proteins KillerRed and  
25 SuperNova are phototoxic proteins engineered to generate ROS and are used in a variety of  
26 biological applications. However, their relative quantum yields and rates of ROS production  
27 are unclear, which has limited the interpretation of their effects when used in biological  
28 systems. We cloned and purified KillerRed, SuperNova, and mCherry - a related red  
29 fluorescent protein not typically considered a photosensitizer - and measured the superoxide  
30 ( $O_2^{\cdot-}$ ) and singlet oxygen ( $^1O_2$ ) quantum yields with irradiation at 561 nm. The formation of the  
31  $O_2^{\cdot-}$ -specific product 2-hydroxyethidium (2-OHE<sup>+</sup>) was quantified via HPLC separation with  
32 fluorescence detection. Relative to a reference photosensitizer, Rose Bengal, the  $O_2^{\cdot-}$   
33 quantum yield ( $\Phi_{O_2^{\cdot-}}$ ) of SuperNova was determined to be 0.00150, KillerRed was 0.00097,  
34 and mCherry 0.00120. At an excitation fluence of 916.5 J/cm<sup>2</sup> and matched absorption at 561  
35 nm, SuperNova, KillerRed and mCherry made 3.81, 2.38 and 1.65  $\mu M O_2^{\cdot-}/min$ , respectively.  
36 Using the probe Singlet Oxygen Sensor Green (SOSG), we ascertained the  $^1O_2$  quantum yield  
37 ( $\Phi^1O_2$ ) for SuperNova to be 0.0220, KillerRed 0.0076, and mCherry 0.0057. These  
38 photosensitization characteristics of SuperNova, KillerRed and mCherry improve our  
39 understanding of fluorescent proteins and are pertinent for refining their use as tools to  
40 advance our knowledge of redox biology.

41

42

43

44 **KEYWORDS:** redox, optogenetics, superoxide, singlet oxygen, photosensitizer, quantum  
45 yield.

46

47

48 **ABBREVIATIONS:**

|    |                                 |                                         |
|----|---------------------------------|-----------------------------------------|
| 49 | 2-OHE <sup>+</sup> :            | 2-hydroxyethidium                       |
| 50 | CALI:                           | Chromophore assisted light inactivation |
| 51 | DHE <sup>+</sup> :              | Dihydroethidium                         |
| 52 | E <sup>+</sup> :                | Ethidium                                |
| 53 | O <sub>2</sub> <sup>•-</sup> :  | Superoxide                              |
| 54 | <sup>1</sup> O <sub>2</sub> :   | Singlet oxygen                          |
| 55 | Φ:                              | Quantum yield                           |
| 56 | ΦO <sub>2</sub> <sup>•-</sup> : | Superoxide quantum yield                |
| 57 | Φ <sup>1</sup> O <sub>2</sub> : | Singlet oxygen quantum yield            |
| 58 | ROS:                            | Reactive oxygen species                 |
| 59 | SOSG:                           | Singlet oxygen sensor green             |
| 60 | SOD:                            | Superoxide dismutase                    |
| 61 | X:                              | Xanthine                                |
| 62 | XO                              | Xanthine oxidase                        |

63

64

65 **GRAPHICAL ABSTRACT**

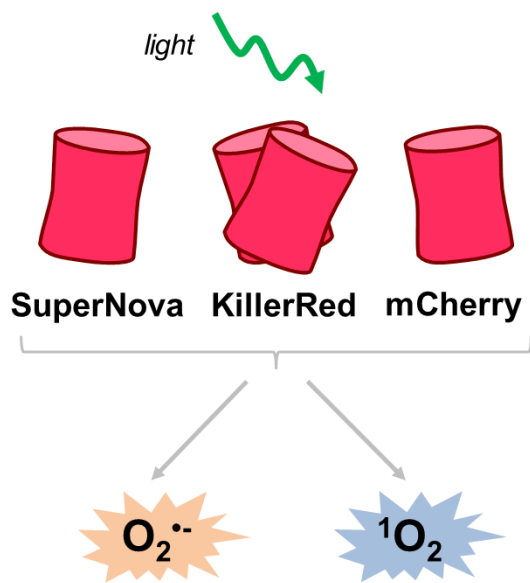

66

67

68

## 69 INTRODUCTION

70 Fluorescent proteins generate reactive oxygen species (ROS) upon irradiation by type  
71 I or type II photosensitization mechanisms [1-4]. The type I mechanism involves electron  
72 transfer reactions that ultimately reduce molecular oxygen to form superoxide ( $O_2^{\cdot-}$ ) [3, 5].  
73 Type II photosensitization involves the direct energy transfer from excited triplet state of the  
74 photosensitizer to oxygen to generate singlet oxygen ( $^1O_2$ ) [4-7]. Both  $O_2^{\cdot-}$  and  $^1O_2$  can be  
75 formed by fluorescent proteins [4, 5] but the relative yields or fluxes depend on various factors,  
76 including the protein structure surrounding the chromophore, the oxygen concentration,  
77 temperature, and pH of the environment [3, 5].

78 A range of phototoxic fluorescent proteins have been developed such as KillerRed,  
79 KillerOrange, SuperNova, miniSOG and their derivatives; however their phototoxic properties  
80 are not fully characterized [1-3, 8-11]. KillerRed, a dimeric red fluorescent protein, was derived  
81 from a random and site-directed mutations of a jellyfish protein, anm2CP [1, 3, 10, 12].  
82 KillerRed has a unique structure with a water channel to the chromophore that is responsible  
83 for its phototoxicity [1, 3, 10, 12]. The original KillerRed protein is prone to variable levels of  
84 dimerization, which can lead to artifacts and mislocalization of fusion proteins within a  
85 biological system [8]. These confounding factors can be mitigated by using the pseudo-  
86 monomeric version tandem KillerRed (tdKillerRed), which consists of two repeats of the  
87 KillerRed coding sequence, meaning that all copies are expressed as a dimer. SuperNova  
88 was derived from KillerRed and retains similar phototoxic properties but exists as a monomer,  
89 thereby limiting potential mislocalization events [8]. Both KillerRed and SuperNova are used  
90 in a variety of applications ranging from localized ROS production to cell ablation, however  
91 the quantities or the species of ROS responsible for the effect are often unclear. KillerRed has  
92 been used for chromophore- assisted light inactivation (CALI) in cells and organelles [1, 13-  
93 16]. These phototoxic effects have been shown to be sensitive to superoxide dismutase  
94 (SOD), catalase, and sodium azide [1, 8], suggesting that KillerRed possesses the capacity to  
95 generate both  $O_2^{\cdot-}$  (and subsequently hydrogen peroxide) and  $^1O_2$  oxidants [1, 2, 8]. Likewise,

96 SuperNova has been shown to oxidize DHE and ADPA probes, implying that it too generates  
97 both  $O_2^{\cdot-}$  and  $^1O_2$  oxidants [8, 17].

98         Although the phototoxic effects of these fluorescent proteins to cellular functioning  
99 have been widely demonstrated, their precise ROS quantum yields, i.e. the ratio of ROS  
100 molecules generated per photon absorbed by the fluorophore, and intrinsic rates of ROS  
101 production have not previously been reported. Therefore, the aim of this study was to  
102 determine the quantum yields and rates of ROS production by phototoxic fluorescent proteins.  
103 Using Rose Bengal, a well-characterized chemical photosensitizer molecule with a defined  
104  $O_2^{\cdot-}$  quantum yield ( $\Phi_{O_2^{\cdot-}}$ ) of 0.2 and  $^1O_2$  quantum yield ( $\Phi^1O_2$ ) of 0.75 as a standard [18], we  
105 determined the relative  $O_2^{\cdot-}$  and  $^1O_2$  quantum yields of KillerRed and SuperNova. As a  
106 negative control for photosensitization we used mCherry, a red fluorescent protein commonly  
107 used as an 'inert' fluorophore in many cellular imaging applications [3, 8]. Overall, we report  
108 the  $O_2^{\cdot-}$  and  $^1O_2$  quantum yield of the fluorescent proteins tdKillerRed and SuperNova, as well  
109 as mCherry.

110

## 111 **MATERIALS AND METHODS**

### 112 **Protein cloning and purification**

113         SuperNova, tdKillerRed, and mCherry were transformed and grown in a culture as  
114 previously described [8, 17]. SuperNova/pRSETB was a gift from Dr. Takeharu Nagai  
115 (Addgene plasmid # 53234) [8]. mCherry (pmCherry-C1) and tdKillerRed (#FP963, Evrogen)  
116 were amplified and ligated into pRSETB using BamHI and EcoRI. Plasmids were then  
117 transfected into JM109 (DE3) XJ autolysis cells, and protein expression was induced with  
118 isopropyl  $\beta$ -D-1-thiogalactopyranoside (IPTG). Cultures were centrifuged at 3200 g for 10 min,  
119 washed with PBS and flash frozen. Cell lysate was run through nickel beads, then protein was  
120 eluted with 100  $\mu$ M imidazole in the presence of protease inhibitors (Roche) and desalted  
121 using a PD-10 column. Protein concentration was determined by Lowry assay, and

122 absorbance scans were performed on a spectrophotometer (Shimadzu) to identify a region of  
123 spectral overlap in absorbance maxima between the proteins and Rose Bengal dye (# 330000,  
124 Sigma). The most robust overlap occurred between 550-580 nm (Fig. 1). Based on this, a 561  
125 nm laser was chosen for subsequent experimentation. Proteins and Rose Bengal were diluted  
126 to achieve equal molar absorptivity at 561 nm using the Beer-Lambert equation ( $A=\epsilon*b*c$ ).  
127

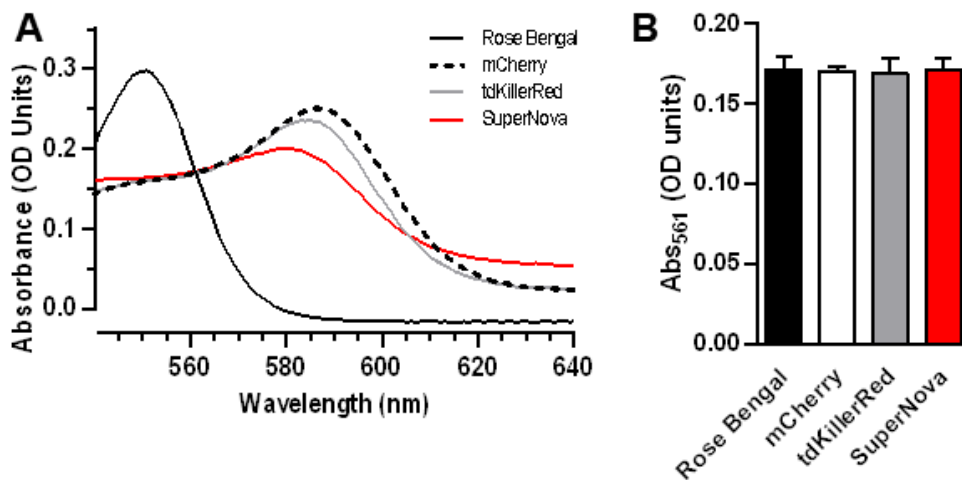

128  
129 Fig. 1. **Equal photosensitizer absorbance at 561 nm.** (a) Absorbance spectrum of photosensitizers. (b)  
130 Absorbance at 561 nm after adjustment of concentration of Rose Bengal dye (0.0026 mg/mL), mCherry (0.22  
131 mg/mL), tdKillerRed (0.25 mg/mL), and SuperNova (0.76 mg/mL). Values are mean  $\pm$  SD for n = 3 independent  
132 experiments; p > 0.05 by one-way ANOVA.

133

### 134 Irradiation parameters

135 Irradiation of fluorescent proteins and the photosensitizing dye, Rose Bengal, were  
136 performed using a 561 nm class IIIb 50 mW diode laser (#1230935, Coherent® OBIS™,  
137 Edmund Optics, NJ, USA). The 0.7 mm diameter beam was focused through a 20x, 0.4 NA  
138 microscope objective lens (Swift) into a 200  $\mu$ m core diameter, 0.22 NA SMA-terminated fiber  
139 optic cable (Part # M25L05, ThorLabs, Inc., Newton, NJ) for delivery to the sample. The fiber  
140 and objective lens were positioned using a Multimode Fiber Coupler Assembly (Part # F-91-

141 C1-T, Newport Corporation, Irvine, CA). Fiber output was collimated with an aspheric lens  
142 (Part # A397TM-B, Thorlabs) to create a 2.5 mm-diameter collimated beam to irradiate each  
143 200  $\mu$ L sample volume contained within a 1.5 mL, 1 cm polystyrene cuvette (#97000-586,  
144 VWR). The irradiance was measured as 25 mW at the front surface of the sample cuvette  
145 using thermopile detector (818P-010-12, Newport Corporation, Irvine, CA) for all irradiation.  
146 Fluence/light dose ( $\text{J}/\text{cm}^2$ ) was modulated by adjusting irradiation time while maintaining a  
147 consistent fluence rate ( $\text{mW}/\text{cm}^2$ ).

148

#### 149 **Determination of photobleaching rates**

150 Photobleaching rates of photosensitizers (Rose Bengal, 0.0026 mg/ml; mCherry, 0.22  
151 mg/ml; KillerRed, 0.25 mg/ml; SuperNova, 0.76 mg/ml) and the probe DHE alone and in  
152 combinations were determined in buffer (D-MRB; 220 mM Manitol, 70 mM Sucrose, 5 mM  
153 MOPS, 2 mM EGTA, 0.4% FFBSA, 0.1 mM DTPA, pH 7.3) at 20 °C. The fluorescence signal  
154 (Ex 525 nm; Em 550 nm) was acquired using a fluorescence spectrophotometer (Cary Eclipse,  
155 Agilent Technologies) during a cumulative time exposure (0-30 min) at 561 nm irradiation for  
156 determination of the reduction in fluorescence. To determine the bleaching rates with SOSG,  
157 DHE was replaced with SOSG in the buffer, and the change in absorbance was measured  
158 between 400 – 800 nm using a spectrophotometer.

159

#### 160 **Xanthine oxidase superoxide production**

161 Xanthine oxidase (XO) production of  $\text{O}_2^{\cdot-}$  was determined as the rate of SOD-sensitive  
162 cytochrome *c* reduction, as previously described [7, 19]. Briefly, XO (0.25, 0.50, 1.0 and 4.0  
163 mU/mL) was added to a 1 cm cuvette containing cytochrome *c* (40  $\mu$ M) in PBS containing  
164 DTPA (D-PBS: 7.78 mM  $\text{Na}_2\text{HPO}_4$ , 2.20 mM  $\text{KH}_2\text{PO}_4$ , 0.1 mM DTPA, pH 7.3). All reactions  
165 were carried out at ambient  $\text{O}_2$  and where indicated catalase (4200 U/mL) or SOD (800 U/mL)  
166 was present. Baseline was collected for 2 min before 1 mM of xanthine (X) was added to



167 initiate the reaction. Cytochrome c reduction was monitored at 550 nm for 10 min, and the rate  
168 was calculated using an extinction coefficient of  $18.7 \text{ mM}^{-1} \text{ cm}^{-1}$  [20].

169

## 170 **Superoxide quantification**

171 The oxidation of dihydroethidium (DHE) yields the  $\text{O}_2^{\cdot-}$  specific fluorescence product 2-  
172 hydroxyethidium (2-OHE<sup>+</sup>) along with non-specific fluorescent products including ethidium  
173 (E<sup>+</sup>), which were separated using HPLC as previously described [7, 17, 21, 22]. Briefly, XO (4  
174 mU/mL) and X (1 mM) were incubated in D-PBS at 20 °C for the indicated time (0 – 60 min).  
175 Rose Bengal (0.0026 mg/mL), mCherry (0.22 mg/ml), tdKillerRed (0.25 mg/ml), or SuperNova  
176 (0.76 mg/ml) were irradiated at 561 nm for the indicated time (0 – 30 min) in D-MRB in the  
177 presence of DHE (100  $\mu\text{M}$ ). For experiments containing photosensitizers, the absorbance was  
178 measured (400-800 nm) both pre- and post-irradiation at 561 nm. To these samples, an equal  
179 volume of 200 mM  $\text{HClO}_4/\text{MeOH}$  was added, centrifuged at  $17,000 \times g$ , and the supernatant  
180 transferred to an equal volume 1 M  $\text{K}^+\text{PO}_4^-$  at pH 2.6.

181 Samples were separated using a Polar-RP column (Phenomenex, 150 x 2 mm; 4 $\mu\text{m}$ ) on a  
182 Shimadzu HPLC with fluorescence detection (RF-20A). The flow rate was constant (0.1  
183 mL/min) using a gradient of two mobile phases (A: 10% ACN, 0.1 %TFA; B: 60% ACN, 0.1  
184 %TFA). The gradient was the following: 0 min, 40% B; 5 min, 40% B; 25 min, 100% B; 30 min,  
185 100% B; 35 min, 40% B; 40min, 40% B. Standard curves were generated against known  
186 concentrations of E<sup>+</sup> and 2-OHE<sup>+</sup>, and peaks were quantified using Lab Solutions (Shimadzu)  
187 [7, 17].

188

## 189 **Singlet oxygen quantification**

190 The  $^1\text{O}_2$  production of photosensitizers (Rose Bengal, 0.0026 mg/mL; mCherry, 0.22  
191 mg/ml; KillerRed, 0.25 mg/ml; SuperNova, 0.76 mg/ml) was measured using SOSG (1  $\mu\text{M}$ ,

192 #S36002, Invitrogen) in D-MRB at 20°C [7]. The SOSG signal (Ex 525 nm; Em 550 nm) was  
193 acquired using a Cary Eclipse fluorescence spectrophotometer (Agilent Technologies) pre-  
194 and post- 561 nm irradiation for determination of the change in SOSG fluorescence intensity  
195 [7].

196

## 197 **Calculations and statistical analysis**

198 Fluorescent protein O<sub>2</sub><sup>-</sup> and <sup>1</sup>O<sub>2</sub> quantum yields were determined after correcting for  
199 the bleaching rates of the photosensitizers, as we have previously demonstrated the  
200 importance of photobleaching in explaining time-dependent ROS production by  
201 photosensitizers [23]. Measurements of fluorescence/absorbance vs. illumination duration  
202 were first normalized to the value prior to illumination, and then fit with an equation of the form  
203  $B(t) = ae^{-bt}$ , where  $a$  and  $b$  are fit coefficients and  $t$  is the illumination duration in seconds.

204 The total number of absorbed photons for a sample can then be expressed as  $A =$   
205  $A_0 \int_0^{t_d} B(t)dt$ , where  $A_0$  is the absorption prior to illumination,  $t_d$  is the illumination duration,  
206 and  $B(t)$  is the bleaching curve described above. Relative to a reference quantum yield ( $\Phi_R$ ),

207 the quantum yield of a sample ( $\Phi_S$ ) can be determined by  $\Phi_S = \frac{out_S/A_S}{out_R/A_R} \cdot \Phi_R$ , where  $out$  is the

208 output of interest and  $A$  is the total number of absorbed photons, as described above.

209 Incorporating correction for bleaching of the sample and reference, with knowledge that pre-  
210 illumination ( $A_0$ ) is equal for all samples, the quantum yield can be expressed as:

$$211 \quad \Phi_S = \frac{out_S}{out_R} \cdot \frac{\int_0^{t_R} B_R(t)dt}{\int_0^{t_S} B_S(t)dt} \cdot \Phi_R,$$

212 where  $out_S$  and  $out_R$  are measured outputs for illumination durations of  $t_S$  and  $t_R$  for the sample  
213 and reference, respectively, and  $B_S$  and  $B_R$  are the corresponding bleaching curves. All fitting  
214 and calculation was performed in MATLAB (The MathWorks, Inc., Natick, MA).

215

216  $O_2^{\cdot -}$  production rates of the fluorescent proteins were calculated based upon the  
217 standard curve generated using X/XO. Since the apparent number of  $O_2^{\cdot -}$  molecules required  
218 to generate one 2-OHE<sup>+</sup> molecule is dependent on the rate of  $O_2^{\cdot -}$ , photosensitizer  $O_2^{\cdot -}$   
219 production was matched with 4 mU/mL XO superoxide generation. Under these conditions  
220 X/XO produced 2.24  $\mu$ M  $O_2^{\cdot -}$ /min. X/XO was incubated (0-60 min) of DHE and 2-OHE<sup>+</sup> was  
221 measured and plotted against the expected cumulative  $O_2^{\cdot -}$  concentration generated during  
222 that time, as previously described [7]. At these lower rates the ratio of  $O_2^{\cdot -}$  to 2-OHE<sup>+</sup> was  
223 linear ( $y = 55.62(x) + 326.2$ ;  $R^2 = 0.98$ ).

224 Statistical analysis: Data were first tested for normality of variance, and were then  
225 analyzed by one- or two-way ANOVA with Tukey's post hoc using GraphPad Prism (v7).

226

## 227 RESULTS

### 228 *Purification and characterization of fluorescent proteins.*

229 Fluorescent proteins subjected to SDS-PAGE migrated at their expected molecular  
230 weight (Supplemental Fig. 1). In order to measure protein photosensitization characteristics  
231 relative to a reference dye (Rose Bengal), we first sought to determine i) a wavelength that  
232 was near the absorption maxima for each chromophore, ii) a concentration of each  
233 chromophore in solution that would allow all of the photosensitizers absorb an equal number  
234 of photons and iii) is not confounded by absorption of photons by other reagents used for  
235 detection of ROS. We determined from absorbance spectra that excitation at 561 nm met each  
236 of these criteria (Fig. 1A), and photosensitizer concentrations were then optically matched for  
237 equal absorbance at 561 nm (Fig. 1B).

238

239

240

241

242 ***Superoxide quantum yield and superoxide generation rate of fluorescent proteins***

243 We measured light-dependent photosensitizer  $O_2^{\cdot-}$  generation using HPLC to quantify  
244 2-OHE<sup>+</sup>, a  $O_2^{\cdot-}$  specific reaction product of DHE [7, 24-26]. Since the known yield of Rose  
245 Bengal served as our reference, we confirmed that Rose Bengal produced 2-OHE<sup>+</sup> in a light  
246 dose-dependent manner (Fig. 2A). Similarly, the fluorescent proteins tdKillerRed, SuperNova  
247 and mCherry also produced 2-OHE<sup>+</sup> in a light dose-dependent manner (Fig. 2B), yet the  
248 magnitude of 2-OHE<sup>+</sup> for the protein photosensitizers was considerably lower than that of  
249 Rose Bengal. For example, after 60 seconds of illumination Rose Bengal generated ~17,000  
250 pmol/mL 2-OHE<sup>+</sup>, while after 300 seconds the fluorescent proteins produced ~500 pmol/mL  
251 (Fig. 2B).

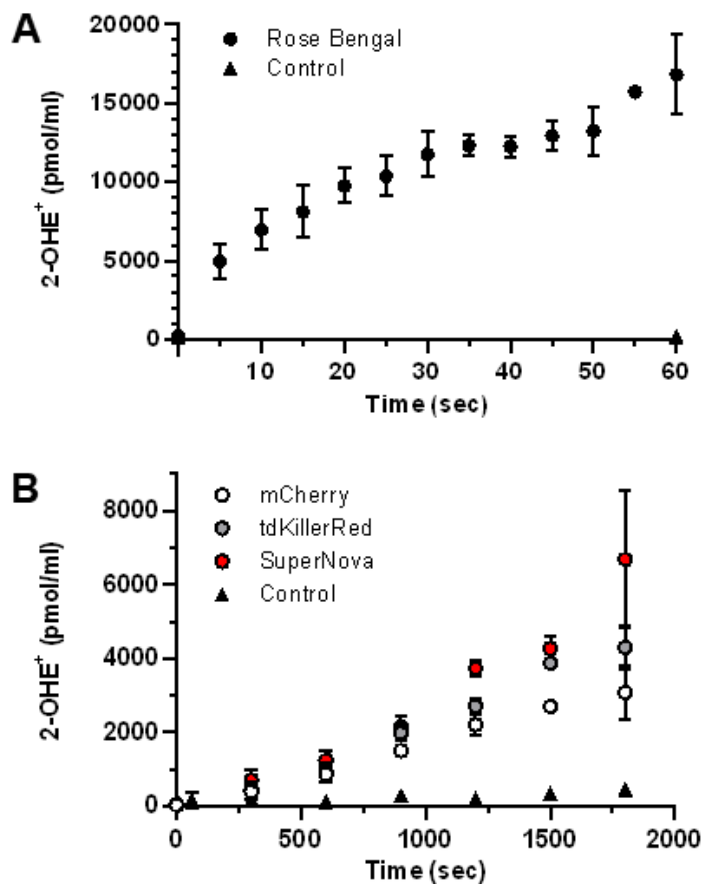

252

253 Fig. 2. **Light-dependent superoxide generation by photosensitizers.** (a) Rose Bengal, (b) tdKillerRed,  
254 Supernova, mCherry and control (no photosensitizer) were irradiated with equal molar absorptivity at 561 nm in  
255 the presence of DHE (100  $\mu$ M) for quantification of 2-OHE<sup>+</sup>. Values are mean  $\pm$  SD for n = 3 independent  
256 experiments.

257

258 Next, we sought to determine the O<sub>2</sub><sup>-</sup> quantum yield of tdKillerRed, SuperNova and  
259 mCherry relative to Rose Bengal, with a known  $\Phi_{O_2^-}$  of 0.2 [18]. The determination of quantum  
260 yields relies on the equal absorbance of photons, yet photobleaching results in a decrease in  
261 photon absorbance over time that occurs at different rates between photosensitizers. We  
262 therefore measured the rate of photosensitizer bleaching by assessing the change in  
263 fluorescence in response to a cumulative light-dose. We then corrected for the bleaching rates  
264 of the individual fluorophores and the probe, DHE, (Supplemental Fig. S2) in order to calculate  
265 the  $\Phi_{O_2^-}$  relative to Rose Bengal. We thus determined that SuperNova had a  $\Phi_{O_2^-}$  of 0.0015,  
266 and tdKillerRed's  $\Phi_{O_2^-}$  was 0.00097; mCherry had a comparable  $\Phi_{O_2^-}$  (Table 1).

267 We next sought to calculate the O<sub>2</sub><sup>-</sup> production rate of fluorophores. However, the  
268 apparent ratio of O<sub>2</sub><sup>-</sup> molecules necessary to form one molecule of 2-OHE<sup>+</sup> is highly  
269 dependent of the rate of O<sub>2</sub><sup>-</sup> generation, possibly due to competition with spontaneous  
270 dismutation [7, 26]. Therefore, we generated a standard curve using a concentration of  
271 xanthine oxidase that produces O<sub>2</sub><sup>-</sup> at a similar rate to that of the photosensitizers. Based on  
272 the results of the dose response (Supplementary Fig. S3), we selected 4 mU/mL of xanthine  
273 oxidase (Fig. 3A) to match the 2-OHE<sup>+</sup> production rates from our photosensitizers at this  
274 concentration and light dose. We determined that 4 mU/mL of xanthine oxidase produces 2.44  
275  $\mu$ M/min of O<sub>2</sub><sup>-</sup>, which was SOD-sensitive and catalase-insensitive (Fig. 3A). We incubated the  
276 same amount of xanthine oxidase in the presence of DHE and measured the formation 2-  
277 OHE<sup>+</sup> over time and expressed it as a function of expected cumulative O<sub>2</sub><sup>-</sup> production. Our  
278 results show a linear increase of 2-OHE<sup>+</sup> with increasing amounts of O<sub>2</sub><sup>-</sup> across the tested  
279 range ( $R^2 = 0.98$ ; Fig. 3B). Given that the photosensitizers absorbed an equal amount of light

280 and hence have the same ability to make ROS (Fig. 1), we then used this equation to derive  
 281 the rate of  $O_2^{\cdot-}$  production by photosensitizers per unit light dose (Fig. 3C & D) from the data  
 282 in Fig. 2. Rose Bengal had the highest rates of  $O_2^{\cdot-}$  production across light doses ( $\sim 300 \mu M$   
 283  $O_2^{\cdot-}$  /min at  $30.55 J/cm^2$ ) with mCherry producing the least amount  $O_2^{\cdot-}$  per light dose ( $\sim 1.65$   
 284  $\mu M O_2^{\cdot-}$  /min at  $916.5 J/cm^2$ ) (Fig. 3C & D). The rate of  $O_2^{\cdot-}$  production by Rose Bengal  
 285 decreased with increasing light dose, which is consistent with the bleaching rate of Rose  
 286 Bengal (Supplemental Fig. 2). The progressive loss of absorption resulted in a fluence-  
 287 dependent decrease in the  $O_2^{\cdot-}$  production rate. At the light doses tested, each of the  
 288 fluorescent proteins showed an increasing  $O_2^{\cdot-}$  production rate that reached a plateau around  
 289  $600 J/cm^2$  (Fig. 3D). The gradual increase in the measured  $O_2^{\cdot-}$  production rate could be due  
 290 to saturation of local reaction sites, such as amino acids, that can quench ROS, or a  
 291 conformational change in the protein resulting in a maximal observed production rate, as has  
 292 been reported for other fluorescent proteins [27]. As the fluorescent proteins bleach at a slower  
 293 rate compared to Rose Bengal (Supplemental Fig. 2), we did not observe the same decrease  
 294 in  $O_2^{\cdot-}$  production rate that was observed for Rose Bengal.

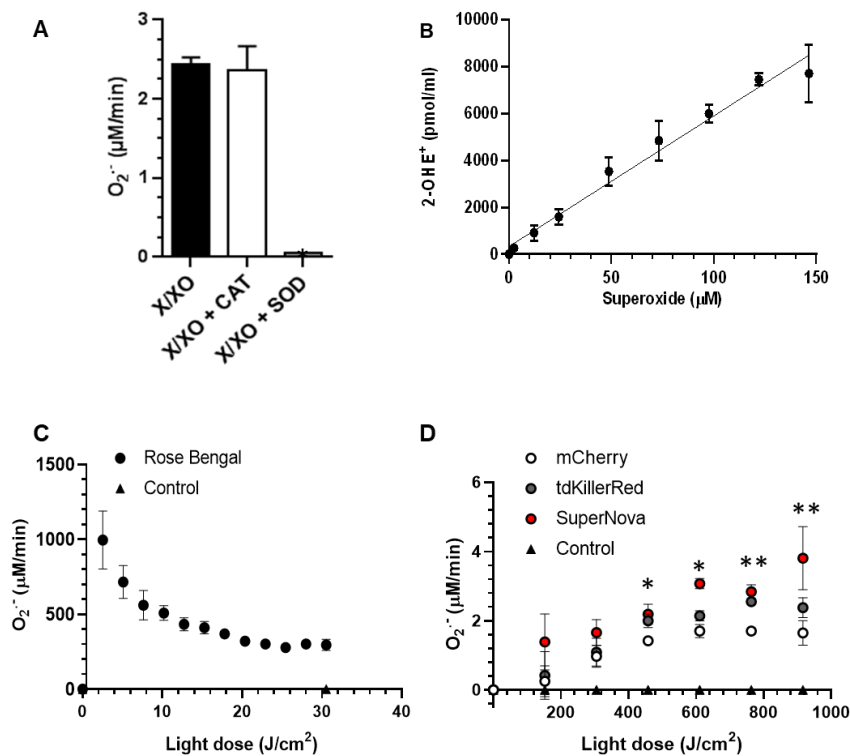

295

296 Fig. 3. **Determination of superoxide production per light dose.** (a) xanthine/xanthine oxidase (X/XO)  $O_2^{\cdot-}$   
297 production was assessed using cytochrome c reduction assay. Xanthine oxidase (XO, 4 mU/mL) and xanthine (X,  
298 1 mM) were incubated with catalase (CAT) superoxide dismutase (SOD) where indicated. \* $p < 0.05$  vs X/XO and  
299 X/XO+CAT, one-way ANOVA, Tukey post hoc. (b) Time course (0-60 min) of X/XO  $O_2^{\cdot-}$  generation was measured  
300 using HPLC separation of 2-OHE<sup>+</sup> and then plotted against the expected  $O_2^{\cdot-}$  production. (c) Rose Bengal  $O_2^{\cdot-}$   
301 production rate per light dose. (d) Fluorescent protein (mCherry, tdKillerRed and SuperNova)  $O_2^{\cdot-}$  production per  
302 light dose. Data from (c) and (d) are derived from data presented in Fig. 2. \* $p < 0.05$  SuperNova vs mCherry, \*\* $p$   
303  $< 0.05$  SuperNova and tdKillerRed vs mCherry, two-way ANOVA, Bonferroni post hoc. Values are mean  $\pm$  SD for  
304  $n = 3$  independent experiments.

305

### 306 ***Singlet oxygen quantum yield of fluorescent proteins***

307 Singlet oxygen sensor green (SOSG) specifically detects  $^1O_2$  [4, 7, 27, 28] and does  
308 not react with other ROS, such as  $O_2^{\cdot-}$  or the hydroxyl radical, making it a suitable  $^1O_2$  detector  
309 under conditions where multiple ROS are being generated [29]. We assessed the  $^1O_2$   
310 production of the photosensitizers by measuring the relative change of SOSG fluorescence  
311 and correcting for the bleaching rate of the individual fluorophores (Supplemental Fig. 2) [18].  
312 Rose Bengal had the greatest SOSG fluorescence change with irradiation time (Fig. 4A)  
313 relative to those of the fluorescent proteins (Fig. 4B). The  $\Phi^1O_2$  of the fluorescent proteins  
314 were then calculated relative to the Rose Bengal reference  $\Phi^1O_2$  of 0.75 [18]. We determined  
315 that SuperNova had the highest  $\Phi^1O_2$  at  $\sim 0.022$ , while mCherry had the lowest  $\Phi^1O_2$  of  
316  $\sim 0.0057$  (Table 1). This demonstrates that mCherry, KillerRed and SuperNova are each  
317 capable of generating  $^1O_2$  in an irradiation dose dependent manner.

318

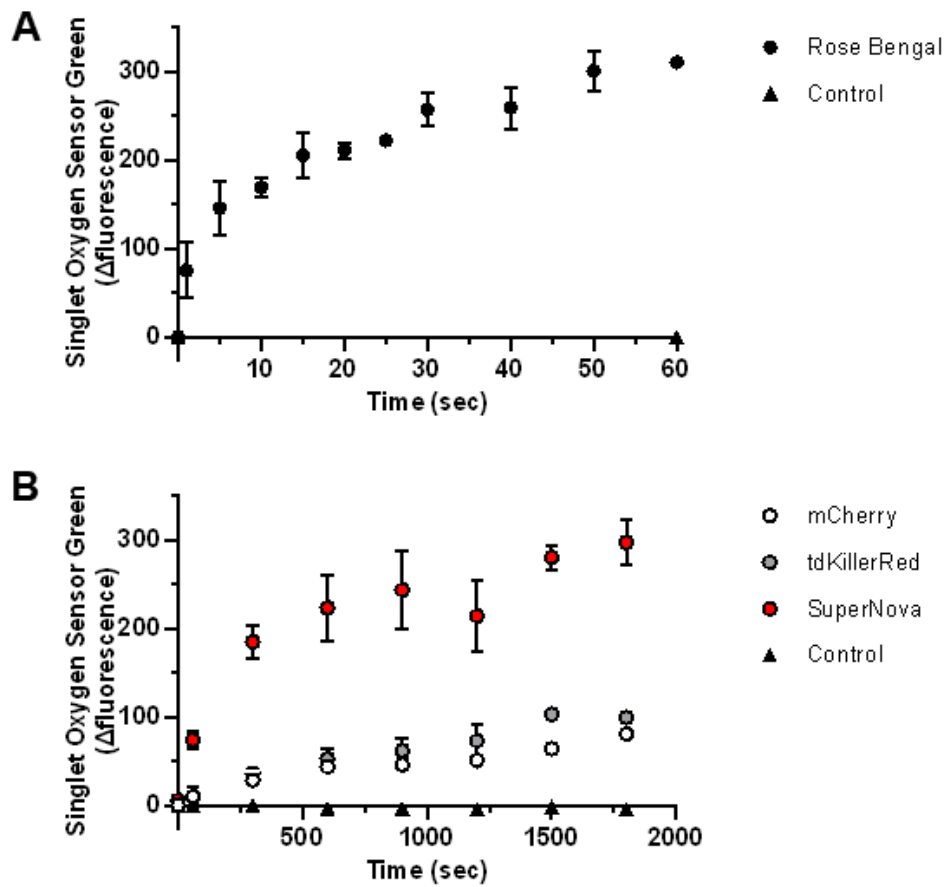

319

320 Fig. 4. Singlet oxygen generation by photosensitizers in response to 561 nm irradiation. (a) Rose Bengal,  
321 (b) tdKillerRed, SuperNova, mCherry and control (no photosensitizer) were irradiated with equal molar absorptivity  
322 at 561 nm in the presence of 0.1  $\mu\text{M}$  SOSG. The initial fluorescence reading (Ex 525 nm; Em 550 nm) was  
323 subtracted from the post-illumination reading and presented as the relative fluorescence change. Values are mean  
324  $\pm$  SD for  $n = 3$  independent experiments.

325

## 326 DISCUSSION

327 The main findings from this study are that the red fluorescent proteins tdKillerRed,  
328 SuperNova, and mCherry each generate  $\text{O}_2^{\cdot-}$  and  $^1\text{O}_2$  via type I and II mechanisms,  
329 respectively. We also report for the first time quantitative ROS quantum yields for tdKillerRed,  
330 SuperNova and mCherry fluorescent proteins.



331 Genetically-encoded photosensitizers are used in a variety of biological applications to  
332 generate ROS in a light-dependent manner. They have the advantage of being targeted to  
333 precise regions in the cell to provide spatial control over ROS production [2]. However, their  
334 precise ROS producing characteristics are often overlooked provided that a biological  
335 phenotype has been observed. In contrast to  $\Phi^1\text{O}_2$ , very little is known about fluorescent  
336 protein  $\Phi\text{O}_2^-$ . This may be a result of the limited methods to selectively detect  $\text{O}_2^-$ , although  
337 one study has reported the  $\Phi\text{O}_2^-$  and  $\Phi^1\text{O}_2$  of red fluorescent protein, TagRFP [4]. Using a  
338 similar SOSG detection approach, the  $\Phi^1\text{O}_2$  was estimated at 0.004, while the  $\Phi\text{O}_2^-$  was  
339 estimated at  $<0.0002$  using DHE bleaching as a measure of  $\text{O}_2^-$  [4].

340 The first developed photosensitizer protein, KillerRed, was initially reported to make  
341  $\text{O}_2^-$  and  $^1\text{O}_2$  [1, 10]. Subsequently, literature has suggested that the KillerRed  
342 photosensitization mechanism selectively produces  $\text{O}_2^-$  and relies on the water channel to the  
343 chromophore for its phototoxicity [10, 30]. Depending on the application, one type of ROS may  
344 predominate in contributing to the light-induced effect. For example,  $^1\text{O}_2$  played a role in  
345 KillerRed CALI experiments [1], while  $\text{O}_2^-$  mediated phototoxicity [31]. While our results  
346 demonstrate that both  $^1\text{O}_2$  and  $\text{O}_2^-$  are capable of being produced, researchers should  
347 consider which species is relevant to their particular biological application.

348 SuperNova was derived from KillerRed, and it would be reasonable to assume that the  
349 photosensitization mechanisms would be similar. Accordingly, SuperNova has been thought  
350 to produce  $\text{O}_2^-$  and  $^1\text{O}_2$ , as measured by 2-OHE<sup>+</sup> formation [17] and ADPA photobleaching  
351 [8], respectively. In the present study, SuperNova's comparatively larger ROS quantum yield  
352 than KillerRed is consistent with previous reports of greater phototoxicity [8]. Specifically, at  
353  $916.5 \text{ J/cm}^2$  of fluence, we show that the SuperNova  $\text{O}_2^-$  production rate is ~1.6 fold higher  
354 than KillerRed. However, the  $\text{O}_2^-$  production rate was not consistent across fluences tested,  
355 and plateaued at the highest light dose tested. While the quantum yields provide a direct  
356 comparison of the phototoxic mechanisms of the red fluorescent proteins tested, caution is  
357 warranted when extrapolating these findings *in vivo*. The  $\text{O}_2$  and pH gradients or endogenous

358 chromophores present in the cellular milieu can affect the ROS generation by  
359 photosensitizers. For example, a high O<sub>2</sub> tension could favor <sup>1</sup>O<sub>2</sub> production, while hypoxic  
360 conditions could favor O<sub>2</sub><sup>•-</sup> production [32].

361 Unlike KillerRed and SuperNova that were derived from the jellyfish protein anm2CP,  
362 mCherry was derived from the sea anemone protein DsRed. Owing to the structural  
363 differences that exist due to their independent lineage, mCherry lacks a water channel,  
364 suggesting that it would not be as phototoxic as KillerRed. Indeed, it is widely used in biological  
365 applications under the assumption that it is photochemically inert. However, some previous  
366 reports have also shown that mCherry can be phototoxic [33] and that it produces O<sub>2</sub><sup>•-</sup> [8, 34]  
367 and <sup>1</sup>O<sub>2</sub> [8] upon irradiation. Our present findings are in agreement with this and indicate that  
368 mCherry actually displays similar  $\Phi_{O_2^{\bullet-}}$  and  $\Phi^1O_2$  as 'professional' photosensitizer proteins.

369 The genetically-encoded photosensitizers display  $\Phi_{O_2^{\bullet-}}$  and  $\Phi^1O_2$  that are orders of  
370 magnitude lower than the chemical photosensitizer Rose Bengal. Yet, despite their lower  
371 quantum yields, their ability to generate a biologically relevant effect is well established [1, 2,  
372 8, 17]. Once formed by the excited chromophore, the superoxide anion must escape the  
373 protein barrel structure in order to be released to the surrounding environment and react with  
374 the ROS probe [10]. The protein barrel likely shields the release of ROS, potentially explaining  
375 the lower observed  $\Phi_{O_2^{\bullet-}}$  of the protein photosensitizers compared to Rose Bengal which can  
376 directly release oxidants to the surrounding aqueous environment. Nevertheless, our current  
377  $\Phi^1O_2$  findings are generally in agreement with other fluorescent proteins that have been  
378 reported to range from  $\Phi^1O_2$  0.004 to 0.030 [3]. Recently, optimized variants have reportedly  
379 reached  $\Phi^1O_2$  ~0.6 [35]. New approaches are aimed at combining the large quantum yields of  
380 chemical photosensitizers with the advantages of genetically-encoded photosensitizers [36].

381

382 **Conclusion**

383 Overall, we demonstrate that the red fluorescent proteins tdKillerRed, SuperNova and  
384 mCherry are able to photosensitize  $O_2^{\cdot-}$  and  $^1O_2$ . Our studies provide  $\Phi O_2^{\cdot-}$ ,  $\Phi^1O_2$  and rates of  
385  $O_2^{\cdot-}$  production across light doses. Our findings will help elucidate mechanisms mediated by  
386 phototoxic proteins and aid in the development of efficient or selective ROS production by  
387 genetically-encoded photosensitizers [35, 37].

388

## 389 **ACKNOWLEDGEMENTS**

390 We thank the members of the mitochondrial research group at the University of  
391 Rochester Medical Center for their valuable suggestions and contributions. AJT current  
392 address: Institute for Physical Activity and Nutrition (IPAN), School of Exercise and Nutrition  
393 Sciences, Deakin University, Burwood, VIC, Australia.

394

395 **Disclosure of funding:** This work was funded by a grant from the National Institutes of Health  
396 to APW (R01 NS092558).

397

398 **Conflicts of interest:** There are no conflicts of interest to declare.

## 399 REFERENCES

- 400 [1] M.E. Bulina, D.M. Chudakov, O.V. Britanova, Y.G. Yanushevich, D.B. Staroverov, T.V. Chepurnykh,  
401 E.M. Merzlyak, M.A. Shkrob, S. Lukyanov, K.A. Lukyanov, A genetically encoded photosensitizer,  
402 *Nature biotechnology* 24(1) (2006) 95-9.
- 403 [2] A.P. Wojtovich, T.H. Foster, Optogenetic control of ROS production, *Redox biology* 2 (2014) 368-  
404 76.
- 405 [3] A.J. Trewin, B.J. Berry, A.Y. Wei, L.L. Bahr, T.H. Foster, A.P. Wojtovich, Light-induced oxidant  
406 production by fluorescent proteins, *Free radical biology & medicine* 128 (2018) 157-164.
- 407 [4] X. Ragas, L.P. Cooper, J.H. White, S. Nonell, C. Flors, Quantification of photosensitized singlet  
408 oxygen production by a fluorescent protein, *Chemphyschem : a European journal of chemical physics*  
409 and physical chemistry 12(1) (2011) 161-5.
- 410 [5] A.A. Krasnovsky, Jr., Primary mechanisms of photoactivation of molecular oxygen. History of  
411 development and the modern status of research, *Biochemistry. Biokhimiia* 72(10) (2007) 1065-80.
- 412 [6] E.A. Souslova, K.E. Mironova, S.M. Deyev, Applications of genetically encoded photosensitizer  
413 miniSOG: from correlative light electron microscopy to immunophotosensitizing, *Journal of*  
414 *biophotonics* 10(3) (2017) 338-352.
- 415 [7] M.E. Barnett, T.M. Baran, T.H. Foster, A.P. Wojtovich, Quantification of light-induced miniSOG  
416 superoxide production using the selective marker, 2-hydroxyethidium, *Free radical biology & medicine*  
417 116 (2018) 134-140.
- 418 [8] K. Takemoto, T. Matsuda, N. Sakai, D. Fu, M. Noda, S. Uchiyama, I. Kotera, Y. Arai, M. Horiuchi, K.  
419 Fukui, T. Ayabe, F. Inagaki, H. Suzuki, T. Nagai, SuperNova, a monomeric photosensitizing fluorescent  
420 protein for chromophore-assisted light inactivation, *Scientific reports* 3 (2013) 2629.
- 421 [9] X. Shu, N.C. Shaner, C.A. Yarbrough, R.Y. Tsien, S.J. Remington, Novel chromophores and buried  
422 charges control color in mFruits, *Biochemistry* 45(32) (2006) 9639-47.
- 423 [10] P. Carpentier, S. Violot, L. Blanchoin, D. Bourgeois, Structural basis for the phototoxicity of the  
424 fluorescent protein KillerRed, *FEBS letters* 583(17) (2009) 2839-42.
- 425 [11] M. Westberg, L. Holmegaard, F.M. Pimenta, M. Etzerodt, P.R. Ogilby, Rational design of an  
426 efficient, genetically encodable, protein-encased singlet oxygen photosensitizer, *Journal of the*  
427 *American Chemical Society* 137(4) (2015) 1632-42.
- 428 [12] M.E. Bulina, K.A. Lukyanov, O.V. Britanova, D. Onichtchouk, S. Lukyanov, D.M. Chudakov,  
429 Chromophore-assisted light inactivation (CALI) using the phototoxic fluorescent protein KillerRed,  
430 *Nature protocols* 1(2) (2006) 947-53.
- 431 [13] T. Shibuya, Y. Tsujimoto, Deleterious effects of mitochondrial ROS generated by KillerRed  
432 photodynamic action in human cell lines and *C. elegans*, *Journal of photochemistry and photobiology.*  
433 *B, Biology* 117 (2012) 1-12.
- 434 [14] B. Wang, P.P. Van Veldhoven, C. Brees, N. Rubio, M. Nordgren, O. Apanasets, M. Kunze, M. Baes,  
435 P. Agostinis, M. Fransen, Mitochondria are targets for peroxisome-derived oxidative stress in cultured  
436 mammalian cells, *Free radical biology & medicine* 65 (2013) 882-894.
- 437 [15] L.W. Shao, R. Niu, Y. Liu, Neuropeptide signals cell non-autonomous mitochondrial unfolded  
438 protein response, *Cell research* 26(11) (2016) 1182-1196.
- 439 [16] Z.X. Liao, Y.C. Li, H.M. Lu, H.W. Sung, A genetically-encoded KillerRed protein as an intrinsically  
440 generated photosensitizer for photodynamic therapy, *Biomaterials* 35(1) (2014) 500-8.
- 441 [17] A.J. Trewin, L.L. Bahr, A. Almast, B.J. Berry, A.Y. Wei, T.H. Foster, A.P. Wojtovich, Mitochondrial  
442 Reactive Oxygen Species Generated at the Complex-II Matrix or Intermembrane Space Microdomain  
443 Have Distinct Effects on Redox Signaling and Stress Sensitivity in *Caenorhabditis elegans*, *Antioxid*  
444 *Redox Signal* (2019).
- 445 [18] P.C. Lee, M.A. Rodgers, Laser flash photokinetic studies of rose bengal sensitized photodynamic  
446 interactions of nucleotides and DNA, *Photochemistry and photobiology* 45(1) (1987) 79-86.
- 447 [19] E.E. Kelley, N.K. Khoo, N.J. Hundley, U.Z. Malik, B.A. Freeman, M.M. Tarpey, Hydrogen peroxide is  
448 the major oxidant product of xanthine oxidase, *Free radical biology & medicine* 48(4) (2010) 493-8.

- 449 [20] E. Margoliash, N. Frohwirt, Spectrum of horse-heart cytochrome c, *Biochem J* 71(3) (1959) 570-2.  
450 [21] J. Zielonka, J. Vasquez-Vivar, B. Kalyanaraman, Detection of 2-hydroxyethidium in cellular  
451 systems: a unique marker product of superoxide and hydroethidine, *Nature protocols* 3(1) (2008) 8-  
452 21.  
453 [22] H. Zhao, J. Joseph, H.M. Fales, E.A. Sokoloski, R.L. Levine, J. Vasquez-Vivar, B. Kalyanaraman,  
454 Detection and characterization of the product of hydroethidine and intracellular superoxide by HPLC  
455 and limitations of fluorescence, *Proceedings of the National Academy of Sciences of the United States*  
456 *of America* 102(16) (2005) 5727-32.  
457 [23] S. Mitra, T.H. Foster, Photophysical parameters, photosensitizer retention and tissue optical  
458 properties completely account for the higher photodynamic efficacy of meso-tetra-hydroxyphenyl-  
459 chlorin vs Photofrin, *Photochemistry and photobiology* 81(4) (2005) 849-59.  
460 [24] B. Kalyanaraman, M. Hardy, R. Podsiadly, G. Cheng, J. Zielonka, Recent developments in detection  
461 of superoxide radical anion and hydrogen peroxide: Opportunities, challenges, and implications in  
462 redox signaling, *Archives of biochemistry and biophysics* 617 (2017) 38-47.  
463 [25] J. Zielonka, M. Hardy, B. Kalyanaraman, HPLC study of oxidation products of hydroethidine in  
464 chemical and biological systems: ramifications in superoxide measurements, *Free radical biology &*  
465 *medicine* 46(3) (2009) 329-38.  
466 [26] R. Michalski, B. Michalowski, A. Sikora, J. Zielonka, B. Kalyanaraman, On the use of fluorescence  
467 lifetime imaging and dihydroethidium to detect superoxide in intact animals and ex vivo tissues: a  
468 reassessment, *Free radical biology & medicine* 67 (2014) 278-84.  
469 [27] R. Ruiz-Gonzalez, A.L. Cortajarena, S.H. Mejias, M. Agut, S. Nonell, C. Flors, Singlet oxygen  
470 generation by the genetically encoded tag miniSOG, *Journal of the American Chemical Society* 135(26)  
471 (2013) 9564-7.  
472 [28] A. Gollmer, J. Arnbjerg, F.H. Blaikie, B.W. Pedersen, T. Breitenbach, K. Daasbjerg, M. Glasius, P.R.  
473 Ogilby, Singlet Oxygen Sensor Green(R): photochemical behavior in solution and in a mammalian cell,  
474 *Photochemistry and photobiology* 87(3) (2011) 671-9.  
475 [29] S. Kim, M. Fujitsuka, T. Majima, Photochemistry of singlet oxygen sensor green, *The journal of*  
476 *physical chemistry. B* 117(45) (2013) 13985-92.  
477 [30] S. Pletnev, N.G. Gurskaya, N.V. Pletneva, K.A. Lukyanov, D.M. Chudakov, V.I. Martynov, V.O.  
478 Popov, M.V. Kovalchuk, A. Wlodawer, Z. Dauter, V. Pletnev, Structural basis for phototoxicity of the  
479 genetically encoded photosensitizer KillerRed, *J Biol Chem* 284(46) (2009) 32028-39.  
480 [31] E.O. Serebrovskaya, E.F. Edelweiss, O.A. Stremovskiy, K.A. Lukyanov, D.M. Chudakov, S.M. Deyev,  
481 Targeting cancer cells by using an antireceptor antibody-photosensitizer fusion protein, *Proceedings*  
482 *of the National Academy of Sciences of the United States of America* 106(23) (2009) 9221-5.  
483 [32] R.C. Gilson, K.C.L. Black, D.D. Lane, S. Achilefu, Hybrid TiO<sub>2</sub> -Ruthenium Nano-photosensitizer  
484 Synergistically Produces Reactive Oxygen Species in both Hypoxic and Normoxic Conditions, *Angew*  
485 *Chem Int Ed Engl* 56(36) (2017) 10717-10720.  
486 [33] R.L. Strack, D.E. Strongin, D. Bhattacharyya, W. Tao, A. Berman, H.E. Broxmeyer, R.J. Keenan, B.S.  
487 Glick, A noncytotoxic DsRed variant for whole-cell labeling, *Nature methods* 5(11) (2008) 955-7.  
488 [34] S. Hoffmann, M. Orlando, E. Andrzejak, C. Bruns, T. Trimbuch, C. Rosenmund, C.C. Garner, F.  
489 Ackermann, Light-Activated ROS Production Induces Synaptic Autophagy, *The Journal of neuroscience*  
490 *: the official journal of the Society for Neuroscience* 39(12) (2019) 2163-2183.  
491 [35] M. Westberg, M. Bregnhøj, M. Etzerodt, P.R. Ogilby, No Photon Wasted: An Efficient and Selective  
492 Singlet Oxygen Photosensitizing Protein, *The journal of physical chemistry. B* 121(40) (2017) 9366-  
493 9371.  
494 [36] J. He, Y. Wang, M.A. Missinato, E. Onuoha, L.A. Perkins, S.C. Watkins, C.M. St Croix, M. Tsang, M.P.  
495 Bruchez, A genetically targetable near-infrared photosensitizer, *Nature methods* 13(3) (2016) 263-8.  
496 [37] M. Westberg, M. Etzerodt, P.R. Ogilby, Rational design of genetically encoded singlet oxygen  
497 photosensitizing proteins, *Curr Opin Struct Biol* 57 (2019) 56-62.

498



500 **TABLE 1:**

501 Superoxide and singlet oxygen quantum yield of mCherry, tdKillerRed, and SuperNova.

| Fluorescent proteins | O <sub>2</sub> <sup>-</sup> Quantum yield ( $\phi_{O_2^-}$ ) | <sup>1</sup> O <sub>2</sub> Quantum yield ( $\phi^1O_2$ ) |
|----------------------|--------------------------------------------------------------|-----------------------------------------------------------|
| mCherry              | 0.00120±0.000044                                             | 0.0057±0.00027                                            |
| tdKillerRed          | 0.00097±0.000042                                             | 0.0076±0.00026                                            |
| SuperNova            | 0.00150±0.000016                                             | 0.0220±0.00180                                            |

502

503 Data are mean ± SD for n=3 independent experiments

504

505 Supplemental Fig. 1.

Fig S1

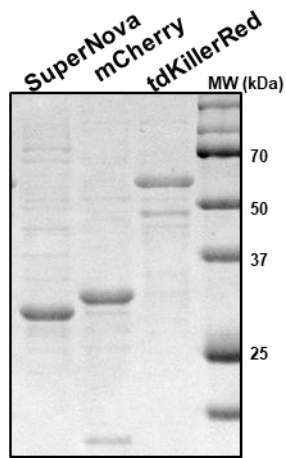

Coomassie stain

506

507 Supplemental Fig. 1. **Purified fluorescent proteins.** Purified SuperNova, mCherry, and tandem KillerRed protein  
508 were denatured in buffer containing 100 mM Tris HCl, 4% w/v SDS, 10% v/v glycerol, 0.2% w/v bromophenol blue,  
509 2% v/v  $\beta$ -mercaptoethanol then heated for 5 min at 95°C before separation by SDS-PAGE (10  $\mu$ g per lane) and  
510 then stained with coomassie blue.



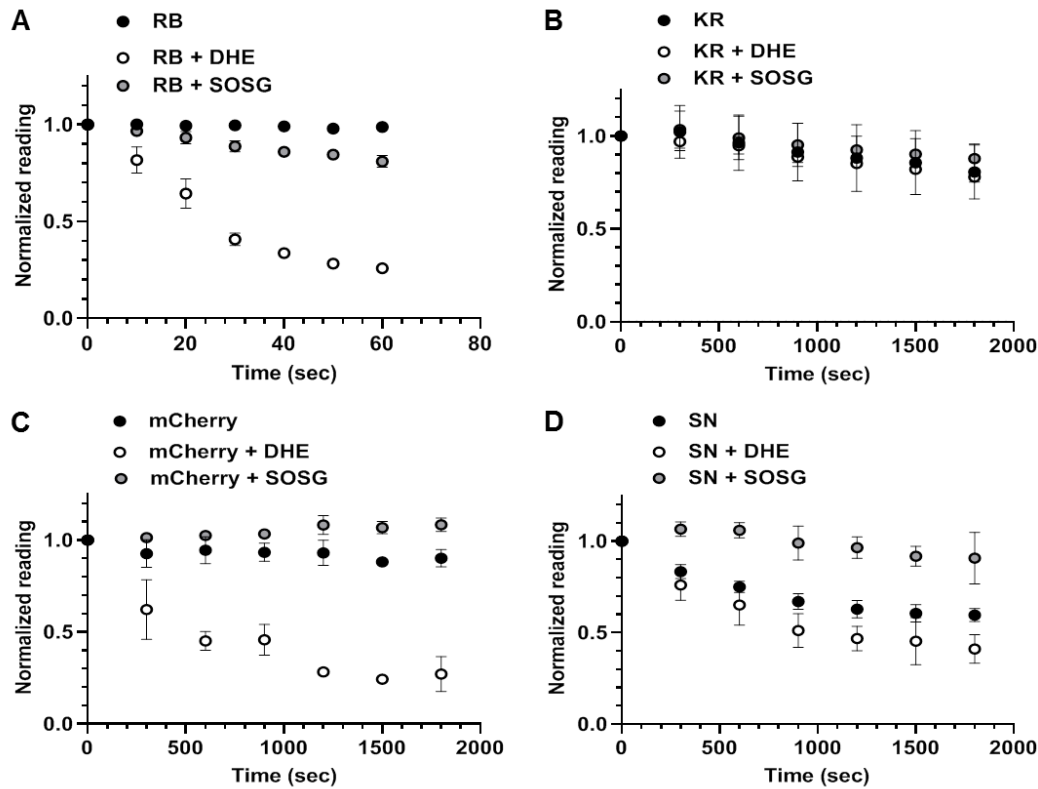

511

512 Supplementary Fig. 2. **Photobleaching rates of photosensitizers with DHE or SOSG.** (A) Rose Bengal, (B)  
513 KillerRed, (C) mCherry, and (D) SuperNova alone or in the presence of dihydroethidium (DHE) or Singlet Oxygen  
514 Sensor Green (SOSG). The cumulative fluorescence (photosensitizer alone or with DHE) or cumulative  
515 absorbance (photosensitizer with SOSG) was measured (0-60 sec for Rose Bengal; 0-30 min for KillerRed,  
516 mCherry, and SuperNova) following irradiation at 561 nm. Data were then normalized to baseline after bleaching  
517 fit correction using MATLAB. Data are N = 3, mean  $\pm$  SD.

518

519

520

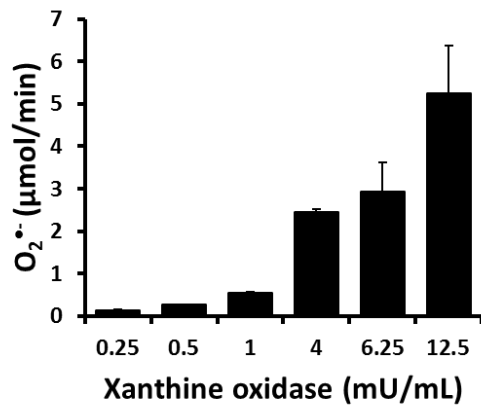

521

522

523 Supplementary Fig. 3. **Dose dependent superoxide production of xanthine oxidase.** Xanthine oxidase (0.25,  
524 0.5, 1, 4, 6.25 and 12.5 mU/mL) superoxide production was assessed with in the presence xanthine (1mM) using  
525 cytochrome c reduction. Data are N = 4 independent values, mean ±SD.

526
